# Supplementary material for: Performance of popular pulse oximeters compared with simultaneous arterial oxygen saturation or clinical-grade pulse oximetry: a cross-sectional validation study in intensive care patients
Source: PubMed Central journal article supplement — BMJ Open Respir Res. 2021 Sep 6;8(1):e000939. doi: 10.1136/bmjresp-2021-000939 (PMC8423509; doi:10.1136/bmjresp-2021-000939), 2021-09-06

## Supplemental data

### Definition of Root mean square difference

$$A_{\text{RMS}} = \sqrt{\frac{1}{n} \sum_{j=1}^n (y_j - \hat{y}_j)^2}$$

$A_{\text{RMS}}$ : root mean square difference;

$n$ : number of samples;

$y_j$  : Pulse oximeter measurement;

$\hat{y}_j$  : Reference standard measurement

We squared the difference (either positive, negative or 0) between a pulse oximeter measurement and the reference standard measurement. Then we calculated the mean of the sum of squares, and determined the root of that mean. As the difference between the pulse oximeter and the reference standard is squared, the  $A_{\text{RMS}}$  is always positive.

### Definition of Mean absolute error

$$\text{MAE} = \frac{1}{n} \sum_{j=1}^n |y_j - \hat{y}_j|$$

$\text{MAE}$ : mean absolute error;

$n$ : number of samples;

$y_j$  : Pulse oximeter measurement;

$\hat{y}_j$  : Reference standard measurement

We calculated the absolute difference (either positive or 0) between a pulse oximeter measurement and the reference standard measurement. We then determined the mean of these absolute differences. Similarly to the  $A_{\text{RMS}}$ , the MAE is always positive, as it concerns an absolute difference.

### References

Kampakis, S. Performance measures RMSE MAE. 2020 [cited 2020 01-10-2020]; Available from: <https://thedata scientist.com/performance-measures-rmse-mae/>.

Lipnick, M.S., The Accuracy of 6 Inexpensive Pulse Oximeters Not Cleared by the Food and Drug Administration: The Possible Global Public Health Implications. *Anesthesia and Analgesia*, 2016. 123(2): p. 339-344.

**Table S1.** Accuracy of pulse oximeters in detecting abnormal oxygenation status, using either  $\text{SaO}_2 \leq 92\%$  or  $\text{SaO}_2 \leq 94\%$  as threshold

| <b>SaO<sub>2</sub> ≤ 92%</b> | <b>Pulse oximeter</b>     | <b>TP/FN</b> | <b>FP/TN</b> | <b>Sensitivity</b> | <b>Specificity</b> | <b>PPV</b> | <b>NPV</b>  | <b>Accuracy</b> |
|------------------------------|---------------------------|--------------|--------------|--------------------|--------------------|------------|-------------|-----------------|
|                              | AFAC FS10D                | 19/6         | 66/141       | 76 (55-91)         | 68 (61-74)         | 22 (18-28) | 96 (92-98)  | 69 (63-75)      |
|                              | AGPTEK FS10C              | 18/7         | 64/144       | 72 (51-88)         | 69 (63-75)         | 22 (17-28) | 95 (92-97)  | 70 (63-75)      |
|                              | ANAPULSE ANP 100          | 18/5         | 76/103       | 78 (56-93)         | 58 (50-65)         | 19 (15-24) | 95 (90-98)  | 60 (53-67)      |
|                              | Cocobear                  | 22/1         | 90/113       | 96 (78-100)        | 56 (49-63)         | 20 (17-23) | 99 (94-100) | 60 (53-66)      |
|                              | Contec CMS50D1            | 13/12        | 34/169       | 52 (31-72)         | 83 (77-88)         | 28 (19-38) | 93 (90-96)  | 80 (74-85)      |
|                              | HYLOGY MD-H37             | 21/4         | 79/128       | 84 (64-95)         | 62 (55-68)         | 21 (17-25) | 97 (93-99)  | 64 (58-70)      |
|                              | Mommed YM101              | 18/7         | 52/152       | 72 (51-88)         | 75 (68-80)         | 26 (20-33) | 96 (92-98)  | 74 (68-80)      |
|                              | PRCMISEMED F4 PRO         | 15/9         | 64/145       | 63 (41-81)         | 69 (63-76)         | 19 (14-25) | 94 (91-96)  | 69 (62-75)      |
|                              | PULOX-PO-200              | 20/5         | 52/154       | 80 (59-93)         | 75 (68-81)         | 28 (22-34) | 97 (93-99)  | 75 (69-81)      |
|                              | Zacurate Pro Series 500DL | 15/7         | 37/153       | 68 (45-86)         | 81 (74-86)         | 29 (21-38) | 96 (92-98)  | 79 (73-85)      |
| <b>SaO<sub>2</sub> ≤ 94%</b> | AFAC FS10D                | 64/6         | 76/86        | 91 (82-97)         | 53 (45-61)         | 46 (41-50) | 93 (87-97)  | 65 (58-71)      |
|                              | AGPTEK FS10C              | 62/8         | 71/92        | 89 (79-95)         | 56 (48-64)         | 47 (42-51) | 92 (86-96)  | 66 (60-72)      |
|                              | ANAPULSE ANP 100          | 60/5         | 102/35       | 92 (83-97)         | 26 (18-34)         | 37 (34-40) | 88 (74-94)  | 47 (40-54)      |
|                              | Cocobear                  | 71/2         | 88/71        | 97 (90-100)        | 45 (37-53)         | 45 (41-48) | 97 (90-99)  | 61 (55-68)      |
|                              | Contec CMS50D1            | 55/15        | 41/117       | 79 (67-87)         | 74 (66-81)         | 57 (50-64) | 89 (83-93)  | 75 (69-81)      |
|                              | HYLOGY MD-H37             | 67/3         | 86/76        | 96 (88-99)         | 47 (39-55)         | 44 (40-48) | 96 (89-99)  | 62 (55-68)      |
|                              | Mommed YM101              | 60/9         | 56/104       | 87 (77-94)         | 65 (57-72)         | 52 (46-57) | 92 (86-96)  | 72 (65-77)      |
|                              | PRCMISEMED F4 PRO         | 57/12        | 75/89        | 83 (72-91)         | 54 (46-62)         | 43 (38-48) | 88 (81-93)  | 63 (56-69)      |
|                              | PULOX-PO-200              | 62/7         | 70/92        | 90 (80-96)         | 57 (49-65)         | 47 (42-52) | 93 (87-96)  | 67 (60-73)      |
|                              | Zacurate Pro Series 500DL | 55/9         | 45/103       | 86 (75-93)         | 70 (62-77)         | 55 (48-61) | 92 (86-95)  | 75 (68-80)      |

The values for PPV, NPV and accuracy are dependent on disease prevalence

TP= true positive, FP= false positive, FN= false negative, TN= true negative, PPV= positive predictive value, NPV= negative predictive value.

**Table S2.** Factors associated with poor performance of each pulse oximeter

| Pulse oximeter            | Associated factor(s)    | Beta | Std Error | P-value |
|---------------------------|-------------------------|------|-----------|---------|
| AFAC FS10D                | Heart rate bias         | 0.04 | 0.01      | 0.002   |
|                           | Systolic blood pressure | 0.04 | 0.01      | 0.005   |
| AGPTEK FS10C              | Heart rate bias         | 0.04 | 0.01      | 0.002   |
|                           | Fitzpatrick scale IV-VI | 1.96 | 0.93      | 0.04    |
| ANAPULSE ANP 100          | None                    | -    | -         | -       |
| Cocobear                  | Systolic blood pressure | 0.03 | 0.02      | 0.03    |
|                           | Fitzpatrick scale IV-VI | 2.30 | 1.21      | 0.05    |
| Contec CMS50D1            | Cold hands to touch     | 1.59 | 0.77      | 0.04    |
| HYLOGY MD-H37             | Fitzpatrick scale IV-VI | 3.07 | 1.13      | 0.007   |
| Momed YM101               | Heart rate bias         | 0.04 | 0.01      | <0.001  |
|                           | Systolic blood pressure | 0.03 | 0.01      | 0.006   |
|                           | Fitzpatrick scale IV-VI | 2.40 | 0.82      | 0.004   |
| PRCMISEMED F4 PRO         | Cold hands to touch     | 2.69 | 1.03      | 0.01    |
|                           | Heart rate bias         | 0.06 | 0.02      | 0.002   |
| PULOX-PO-200              | Cold hands to touch     | 1.60 | 0.62      | 0.01    |
|                           | Systolic blood pressure | 0.03 | 0.01      | 0.006   |
| Zacurate Pro Series 500DL | Heart rate bias         | 0.06 | 0.02      | 0.002   |
|                           | Fitzpatrick scale IV-VI | 2.34 | 1.1       | 0.038   |

Performance of each pulse oximeter was based on bias ( $SpO_2 - SaO_2$ ), a continuous metric. Included variables in logistic models were: age (years), sex, Fitzpatrick scale (I-III vs IV-VI), heart rate bias (difference between pulse oximeter heart rate and true heart rate as captured by ICU monitor), body temperature (degrees C), cold hands to touch (yes/no), systolic blood pressure (mmHg), and use of vasopressor drugs (yes/no).

**Figure S1.** Bland-Altman plots of performance of pulse oximeters (bias compared with SaO<sub>2</sub>)

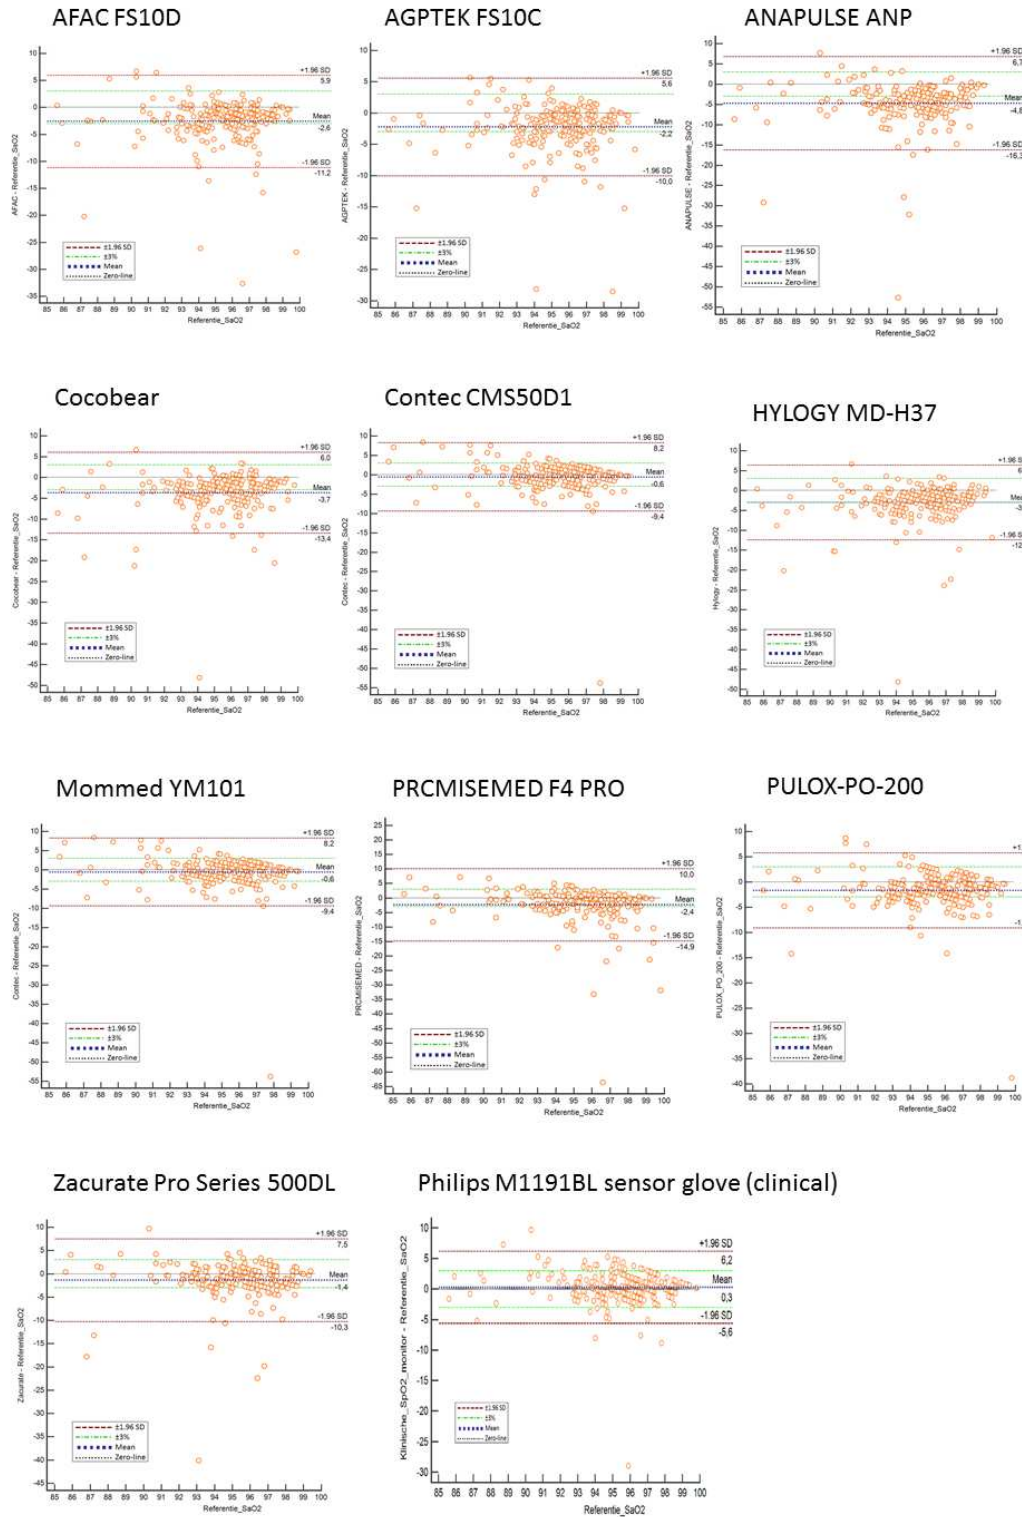

Supplement: bmjresp-2021-000939supp001.pdf [file bmjresp-2021-000939supp001.pdf]
